# Supplementary material
Source: Springer Nature journal article supplement (https://www.springermedizin.de/resource/supplementary/12936_2011_2027_MOESM2_ESM.pdf/9543372)
Supplement: MOESM2 [file 9543372]

A

|                  | 60          | 70        | 80       | 90       | 100      | 110      |
|------------------|-------------|-----------|----------|----------|----------|----------|
| An.aconitus      | ACACCAGCACG | TGTTGCATT | TAGGTGTA | ACTACTGT | CCTTGACA | CAATGACA |
| An.balabacensis  | ACACCAGCACG | TGTTGCATT | TAGGTGTA | ACTACTGT | CCTTGACA | CAATGACA |
| An.barbirostris  | ACACCAGCACG | TGTTGCATT | TAGGTGTA | ACTACTGT | CCTTGACA | CAATGACA |
| An.barbumbrosus  | ACACCAGCACG | TGTTGCATT | TAGGTGTA | ACTACTGT | CCTTGACA | CAATGACA |
| An.farauti       | ACACCAGCACG | TGTTGGA   | TAGGTGTA | ACTACTGT | CCTTGACA | CAATGACA |
| An.flavirostris  | ACACCAGCACG | TGTTGCATT | TAGGTGTA | ACTACTGT | CCTTGACA | CAATGACA |
| An.indefinitus   | ACACCAGCACG | TGTTGCATT | TAGGTGTA | ACTACTGT | CCTTGACA | CAATGACA |
| An.kochi         | ACACCAGCACG | TGTTTCA   | TAGGTGTA | ACTACTGT | CCTTGACA | CAATGACA |
| An.letifer       | ACACCAGCACG | TGTTGCATT | TAGGTGTA | ACTACTGT | CCTTGACA | CAATGACA |
| An.maculatus     | ACACCAGCACG | TGTTGCATT | TAGGTGTA | ACTACTGT | CCTTGACA | CAATGACA |
| An.nigerrimus    | ACACCAGCACG | TGTTTCA   | TAGGTGTA | ACTACTGT | CCTTGACA | CAATGACA |
| An.lesteri       | ACACCAGCACG | TGTTGCATT | TAGGTGTA | ACTACTGT | CCTTGACA | CAATGACA |
| An.subpictus     | ACACCAGCACG | TGTTGCATT | TAGGTGTA | ACTACTGT | CCTTGACA | CAATGACA |
| An.sulawesi      | ACACCAGCACG | TGTTGCATT | TAGGTGTA | ACTACTGT | CCTTGACA | CAATGACA |
| An.sundaicus     | ACACCAGCACG | TGTTTCA   | TAGGTGTA | ACTACTGT | CCTTGACA | CAATGACA |
| An.tessellatus   | ACACCAGCACG | TGTTGCATT | TAGGTGTA | ACTACTGT | CCTTGACA | CAATGACA |
| An.vagus         | ACACCAGCACG | TGTTGCATT | TAGGTGTA | ACTACTGT | CCTTGACA | CAATGACA |
| An.peditaeniatus | ACACCAGCACG | TGTTGCATT | TAGGTGTA | ACTACTGT | CCTTGACA | CAATGACA |
| An.punctulatus   | ACACCAGCACG | TGTTGCATT | TAGGTGTA | ACTACTGT | CCTTGACA | CAATGACA |

B

|                  | 297         | 302         | 307        | 312        |
|------------------|-------------|-------------|------------|------------|
| An.aconitus      | PSGLIVIIISW | VSEFWLNRNAT | PARVALGVIT | VLIMTILMSS |
| An.balabacensis  | .....       | .....       | .....      | .....      |
| An.barbirostris  | .....       | .....       | .....      | .....      |
| An.barbumbrosus  | .....       | .....       | .....      | .....      |
| An.farauti       | .....       | .....       | G          | .....      |
| An.flavirostris  | .....       | .....       | .....      | .....      |
| An.indefinitus   | .....       | .....       | .....      | .....      |
| An.kochi         | .....       | .....       | S          | .....      |
| An.letifer       | .....       | .....       | .....      | .....      |
| An.maculatus     | .....       | .....       | .....      | .....      |
| An.nigerrimus    | .....       | .....       | S          | .....      |
| An.lesteri       | .....       | .....       | .....      | .....      |
| An.subpictus     | .....       | .....       | .....      | .....      |
| An.sulawesi      | .....       | .....       | .....      | .....      |
| An.sundaicus     | .....       | .....       | S          | .....      |
| An.tessellatus   | .....       | .....       | .....      | .....      |
| An.vagus         | .....       | .....       | .....      | .....      |
| An.peditaeniatus | .....       | .....       | .....      | .....      |
| An.punctulatus   | Q.....      | .....       | .....      | .....      |
